# Supplementary material
Source: Springer Nature journal article supplement (https://www.springermedizin.de/resource/supplementary/12885_2014_4774_MOESM1_ESM.pdf/9467256)

17:52:05  
No.1911

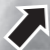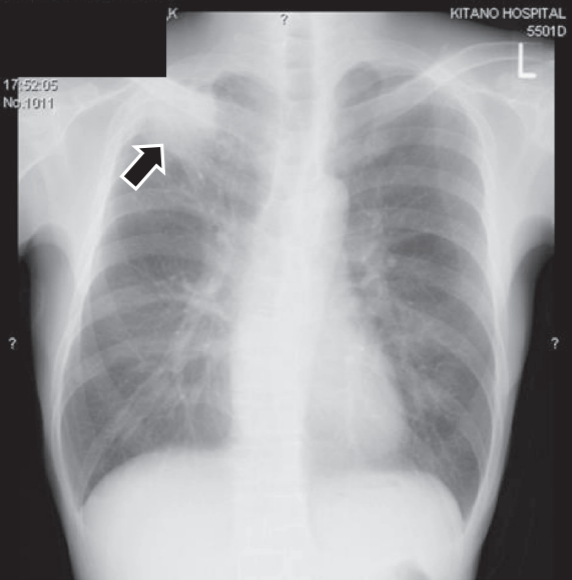

Supplement: MOESM1 [file 9467256]
